# Supplementary material for: Isostructural coordination polymers of the tethering naphthalene anchored bis(2-methylpyridinecarboxamide) ligand: single crystal, XPS, EDS and theoretical studies
Source: Royal Society of Chemistry journal article supplement (doi:10.1039/d3nj00038a), 2023-01-01
Supplement: d3nj00038a1.pdf [file d3nj00038a1.pdf]

## Supplementary information

### Isostructural coordination polymers of tethering naphthalene anchored bis(2-methylpyridinecarboxamide) ligand: Single crystal, XPS, EDS and theoretical studies

Love Karan Rana<sup>1\*</sup>, Prabhjyot Kaur<sup>1</sup>, Alborz Bavandsavadkouhi<sup>1</sup>, Gurpreet Singh Selopal<sup>2</sup>, and Adam Duong<sup>1</sup>

#### Table of contents

|                                                                                                                   |     |
|-------------------------------------------------------------------------------------------------------------------|-----|
| 1. Comparison of PXRD pattern of asynthesized compound <b>1</b> with the simulated pattern (Fig. S1).....         | 2   |
| 2. Comparison of PXRD pattern of asynthesized compound <b>2</b> with the simulated pattern (Fig. S2) .....        | 2   |
| 3. Comparison of PXRD pattern of asynthesized compound <b>3</b> with the simulated pattern (Fig. S2) .....        | 3   |
| 4. BFDH morphologies of <b>L1</b> , compound <b>1</b> (Fig. S4).....                                              | 3   |
| 5. Diffraction data plots showing weak diffraction from the crystal at higher angles (Fig. S5)                    |     |
| 6. <sup>1</sup> H-NMR of <b>L1</b> (Fig. S6).....                                                                 | 4   |
| 7. <sup>13</sup> C-NMR of <b>L1</b> (Fig. S7). .....                                                              | 4   |
| 8. IR spectra comparison involving <b>L1</b> and compounds <b>1</b> , <b>2</b> , and <b>3</b> (Fig. S8).<br>..... | 5   |
| 9. Table S1- I.R table.....                                                                                       | 6-7 |
| 10. ORTEP diagram of <b>L1</b> at 40% probability (Fig. S9). .....                                                | 7   |
| 11. Showing the dihedral angle between pyridine and naphthalene ring planes of <b>L1</b> . (Fig. S10) .....       | 7   |
| 12. ORTEP diagram of compound <b>1</b> at 40% ellipsoidal probability (Fig. S11)<br>.....                         | 7   |
| 13. ORTEP diagram of compound <b>2</b> at 40% ellipsoidal probability (Fig. S12).<br>.....                        | 9   |
| 14. ORTEP diagram of compound <b>3</b> at 40% ellipsoidal probability (Fig. S13).....                             | 9   |

|                                                                                                                           |        |
|---------------------------------------------------------------------------------------------------------------------------|--------|
| 15. Supramolecular synthons generated in a 2D sheet and 3D hydrogen bonded framework of compound <b>1</b> (Fig. S14)..... | 10     |
| 16. XPS spectral peaks for compound <b>2</b> (Fig. S15).....                                                              | 10     |
| 17. XPS spectral peaks for compound <b>3</b> (Fig. S16).....                                                              | 11     |
| 18. EDS spectra of compound <b>2</b> (Fig. S17).....                                                                      | 12     |
| 19. EDS spectra of compound <b>3</b> (Fig. S18).....                                                                      | 12     |
| 20. Thermogravimetry curves for <b>L1</b> and <b>1-3</b> (Fig. S19).....                                                  | 13     |
| 21. Energy gap between excited and ground states of compounds <b>1</b> and <b>3</b> (Fig. S20).....                       | 13, 14 |
| 22. Hydrogen bonds for <b>L1</b> [Å and deg.] (Table S2) .....                                                            | 13     |
| 23. Hydrogen bonds for compound <b>1</b> [Å and deg.] (Table S3) .....                                                    | 14     |
| 24. Hydrogen bonds for compound <b>2</b> [Å and deg.] (Table S4) .....                                                    | 15     |
| 25. Hydrogen bonds for compound <b>3</b> [Å and deg.] (Table S5) .....                                                    | 16     |

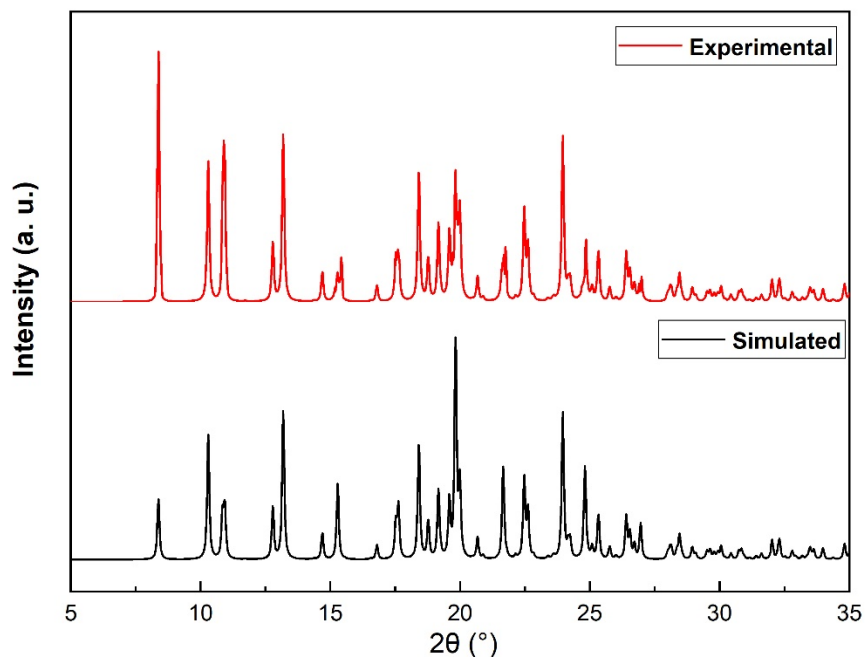

**Figure S1** Shows the comparison of powder patterns of compound **1**.

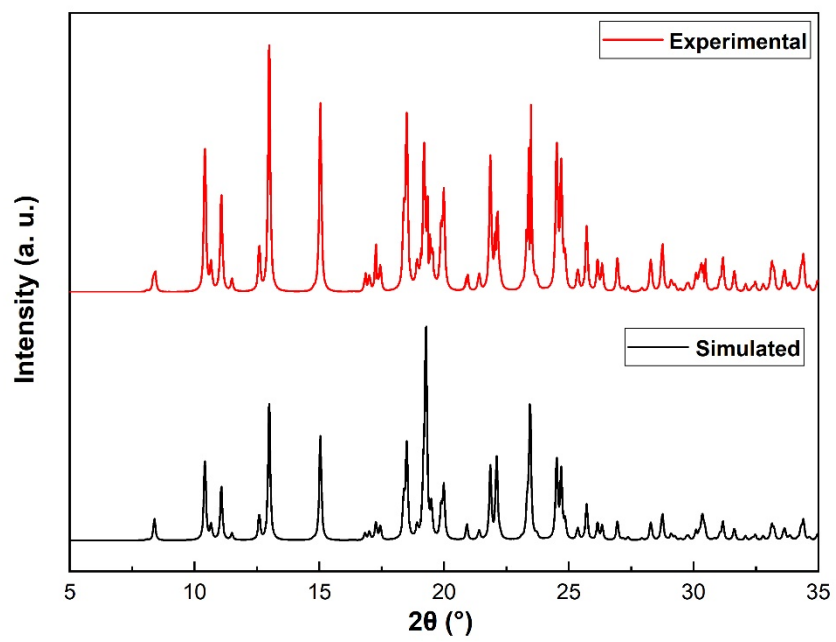

**Figure S2** Shows the comparison of powder patterns of compound **2**.

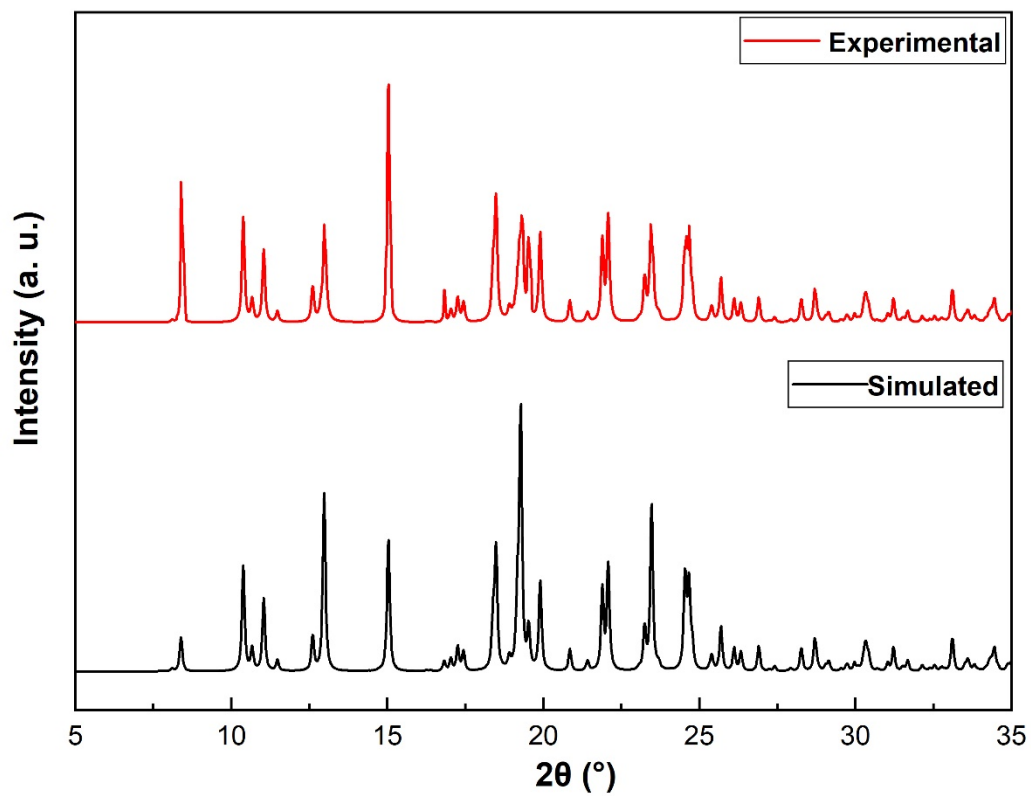

**Figure S3** Shows the comparison of powder patterns of compound **3**.

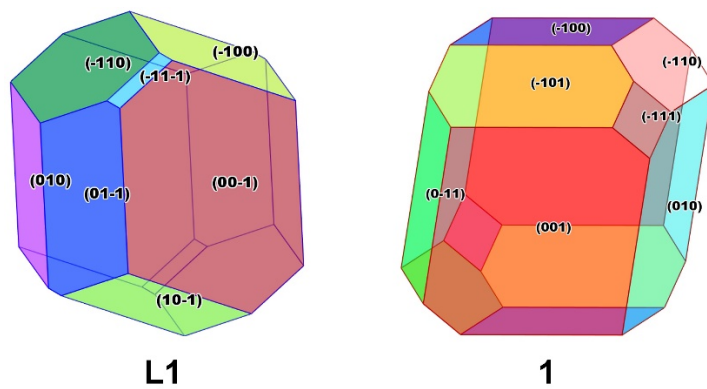

**Figure S4** BFDH morphologies of **L1** and compound **1**.

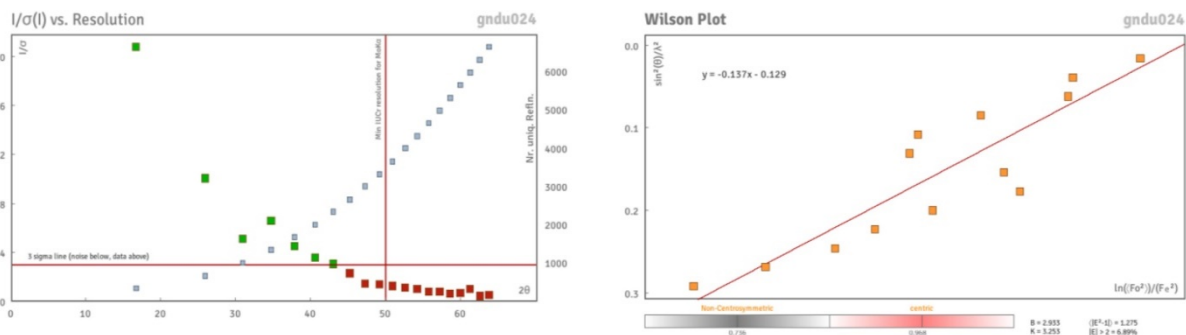

**Figure S5** Diffraction data plots showing noise at higher angles ( $I/\sigma(I)$  vs resolution plot) and poor quality of data (large deviation from straight line in Wilson plot).

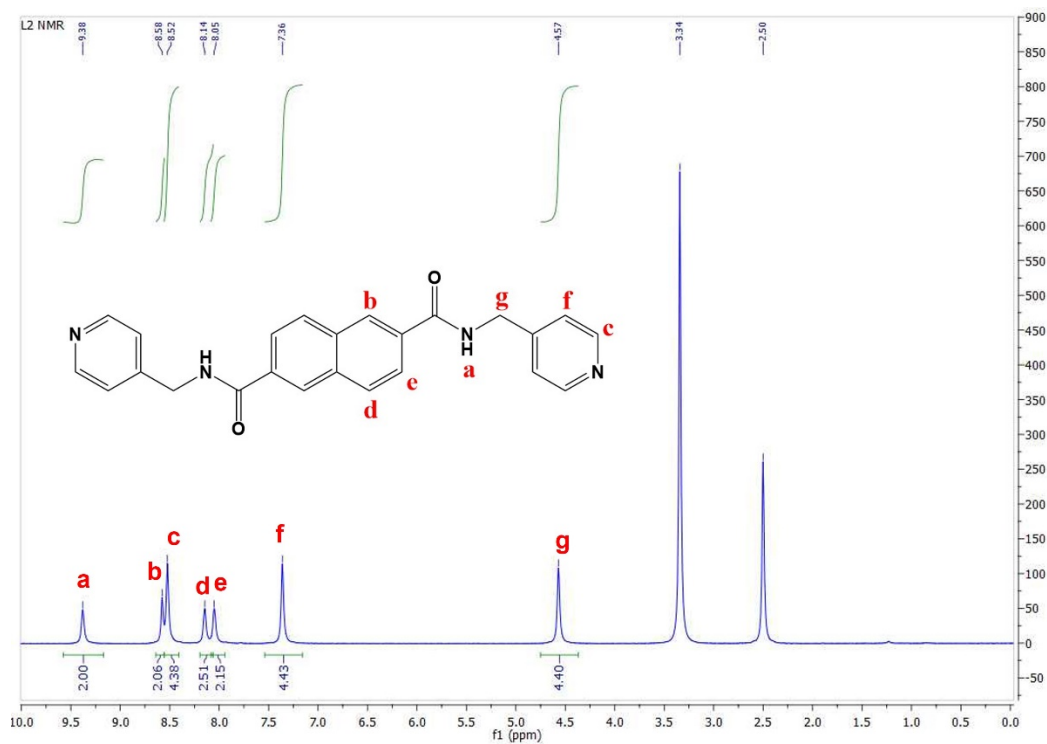

**Figure S6**  $^1\text{H-NMR}$  of L1.

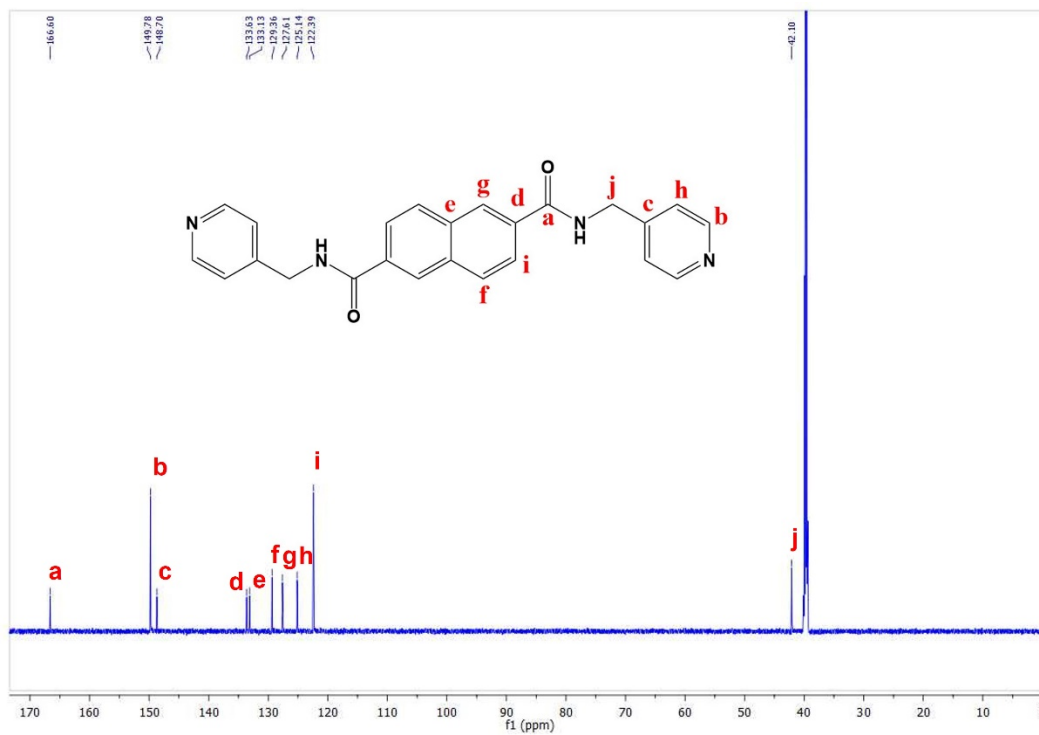

Figure S7  $^{13}\text{C}$ -NMR of L1.

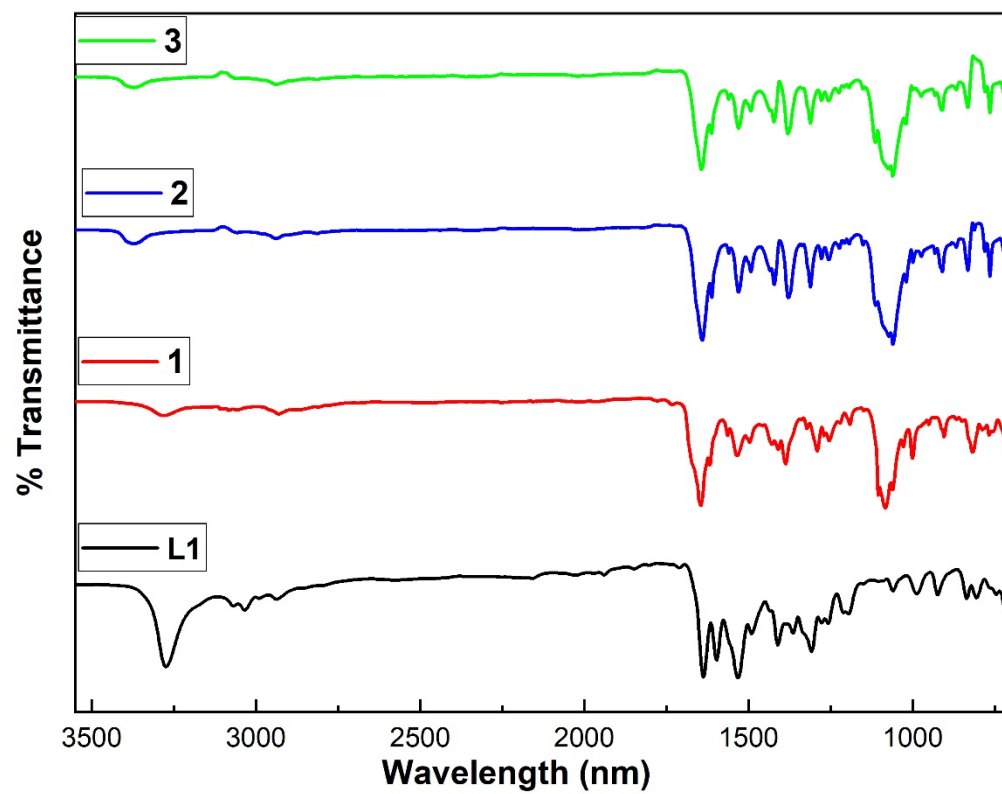

**Figure S8** IR spectra comparison involving **L1** and compounds **1**, **2**, and **3**.

**Table S1** – Characteristic IR peaks for **L1** and compounds **1**, **2**, and **3**.

| <b>Complex</b> | <b>Group</b>                      | <b>Functionality</b> | <b>Wavenumber (cm<sup>-1</sup>)</b> |
|----------------|-----------------------------------|----------------------|-------------------------------------|
| <b>L1</b>      | $\nu$ (O-H) <sub>Stretching</sub> | Water                | 3272 (s)                            |
|                | $\nu$ (N-H) <sub>Stretching</sub> | Amide                | 3068 (w,b)                          |
|                | $\nu$ (C=O)                       | Amide                | 1639 (s)                            |
|                | $\nu$ (C=N)                       | Pyridine             | 1597 (s)                            |
|                | $\nu$ (C=C)                       | Pyridine             | 1533 (b)                            |
|                | $\nu$ (C-H) <sub>Stretching</sub> | Methylene            | 2937(m)                             |
|                | $\nu$ (C=C)                       | Naphthalene          | 1487 (w)                            |
| <b>1</b>       | $\nu$ (N-H)                       | Amide                | 3076 (w)                            |
|                | $\nu$ (C=O)                       | Amide                | 1645 (s)                            |
|                | $\nu$ (C=N)                       | Pyridine             | 1615 (w)                            |
|                | $\nu$ (C=C)                       | Pyridine             | 1532 (m, b)                         |
|                | $\nu$ (C-H) <sub>Stretching</sub> | Methylene            | 2932 (vw)                           |
|                | $\nu$ (C=C)                       | Naphthalene          | 1494 (w)                            |
|                |                                   | $\nu$ (Cl-O)         | Perchlorate                         |
| <b>2</b>       | $\nu$ (N-H)                       | Amide                | 3069 (w)                            |
|                | $\nu$ (C=O)                       | Amide                | 1640 (s)                            |
|                | $\nu$ (C=N)                       | Pyridine             | 1611 (w)                            |
|                | $\nu$ (C=C)                       | Pyridine             | 1533 (s)                            |
|                | $\nu$ (C-H) <sub>Stretching</sub> | Methylene            | 2940 (vw)                           |
|                | $\nu$ (C=C)                       | Naphthalene          | 1493 (w)                            |
|                |                                   | $\nu$ (Cl-O)         | Perchlorate                         |
| <b>3</b>       | $\nu$ (N-H)                       | Amide                | 3071 (w)                            |
|                | $\nu$ (C=O)                       | Amide                | 1643 (s)                            |
|                | $\nu$ (C=N)                       | Pyridine             | 1612 (w)                            |
|                | $\nu$ (C=C)                       | Pyridine             | 1529 (s)                            |
|                | $\nu$ (C-H) <sub>Stretching</sub> | Methylene            | 2935 (vw)                           |
|                | $\nu$ (C=C)                       | Naphthalene          | 1492 (w)                            |
|                |                                   | $\nu$ (Cl-O)         | Perchlorate                         |

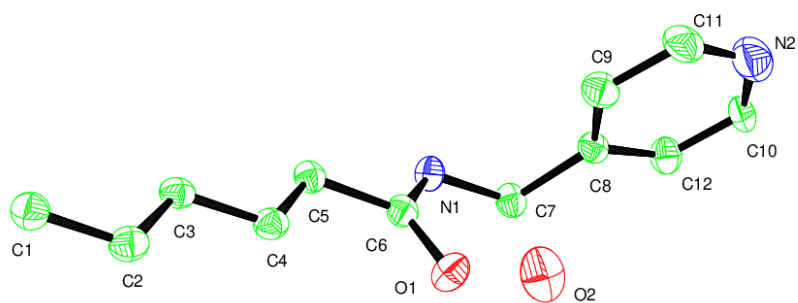

**Figure S9** ORTEP diagram of **L1** drawn at 40% ellipsoidal probability (Hydrogen atoms have not been shown for clarity).

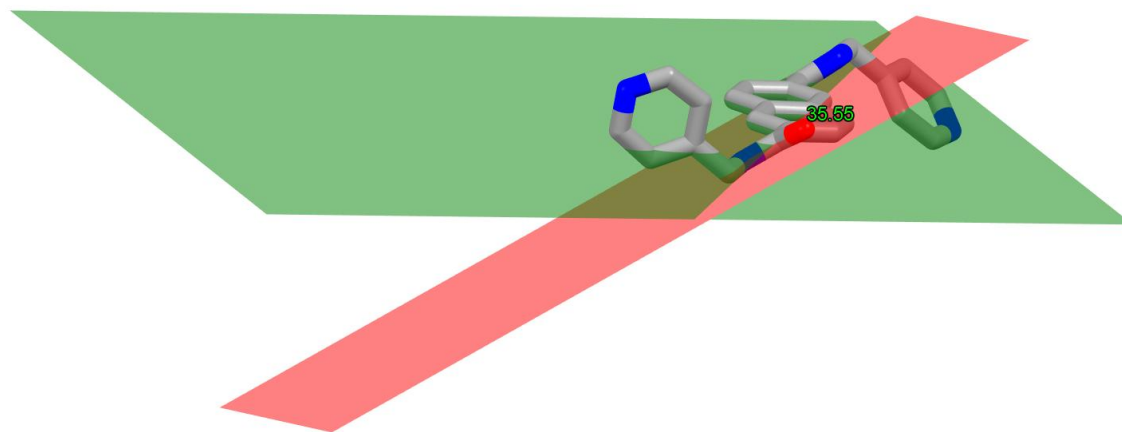

**Figure S10** Showing the dihedral angle between pyridine and naphthalene ring planes of **L1**.



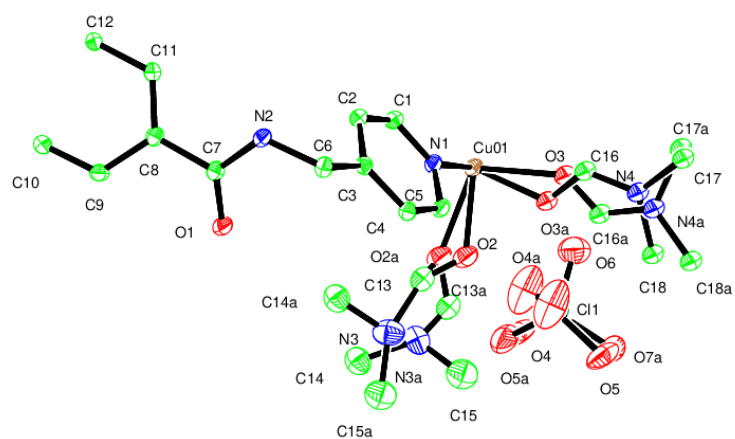

**Figure S11** ORTEP diagram of compound **1** at 40% ellipsoidal probability.

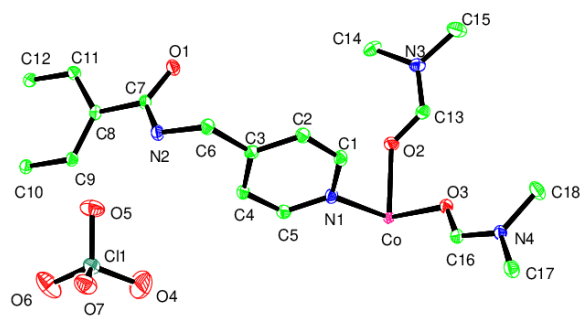

**Figure S12** ORTEP diagram of compound **2** at 40% ellipsoidal probability.

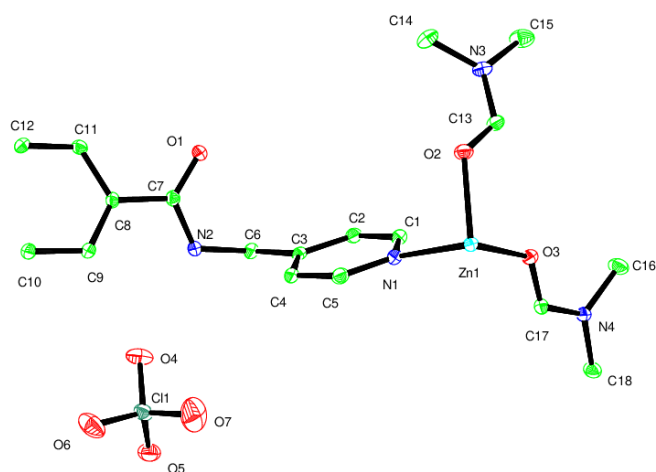

**Figure S13** ORTEP diagram of compound **3** at 40% ellipsoidal probability.

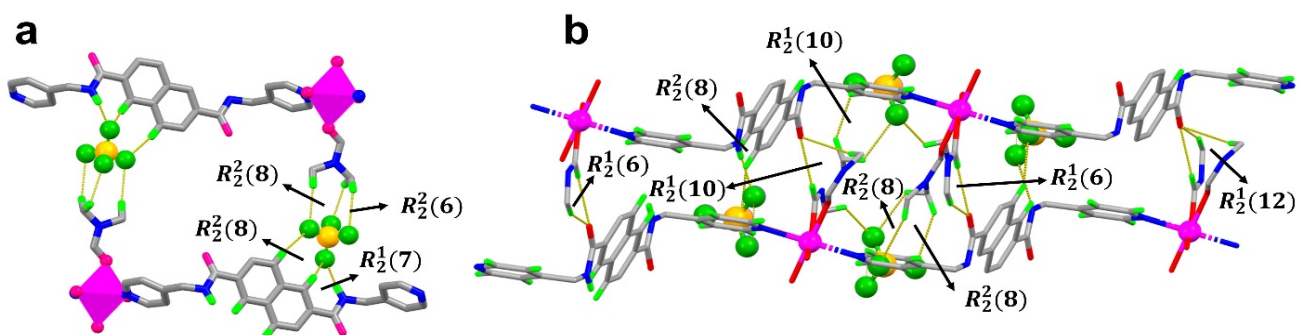

**Figure S14** Supramolecular synthons generated in a 2D sheet and 3D hydrogen bonded framework of compound **1**.

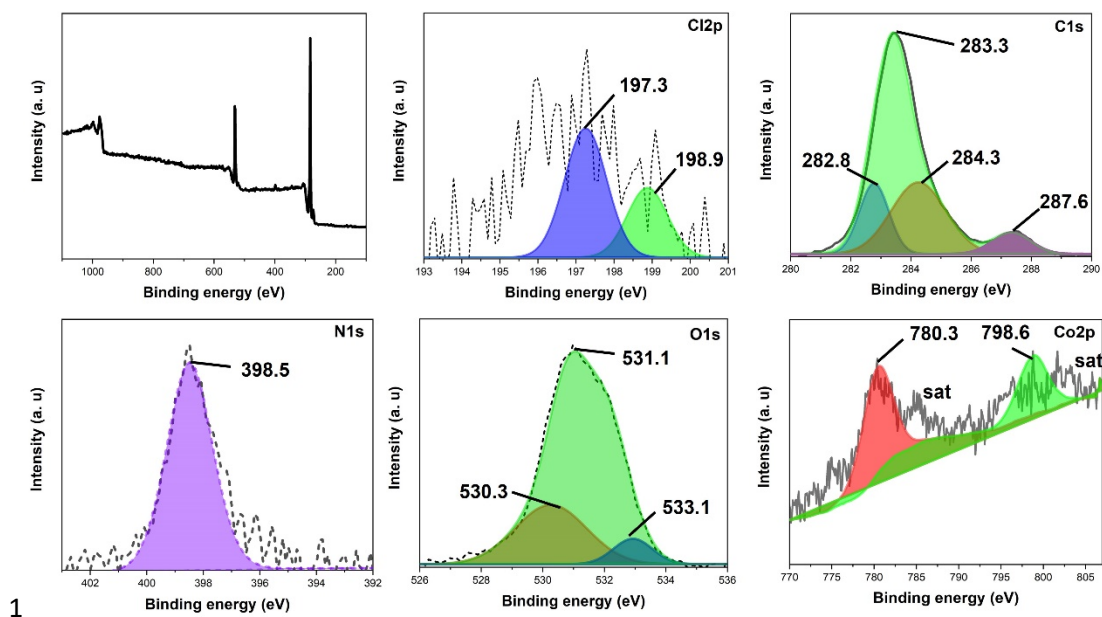

Figure S15 XPS spectral peaks for compound 2.

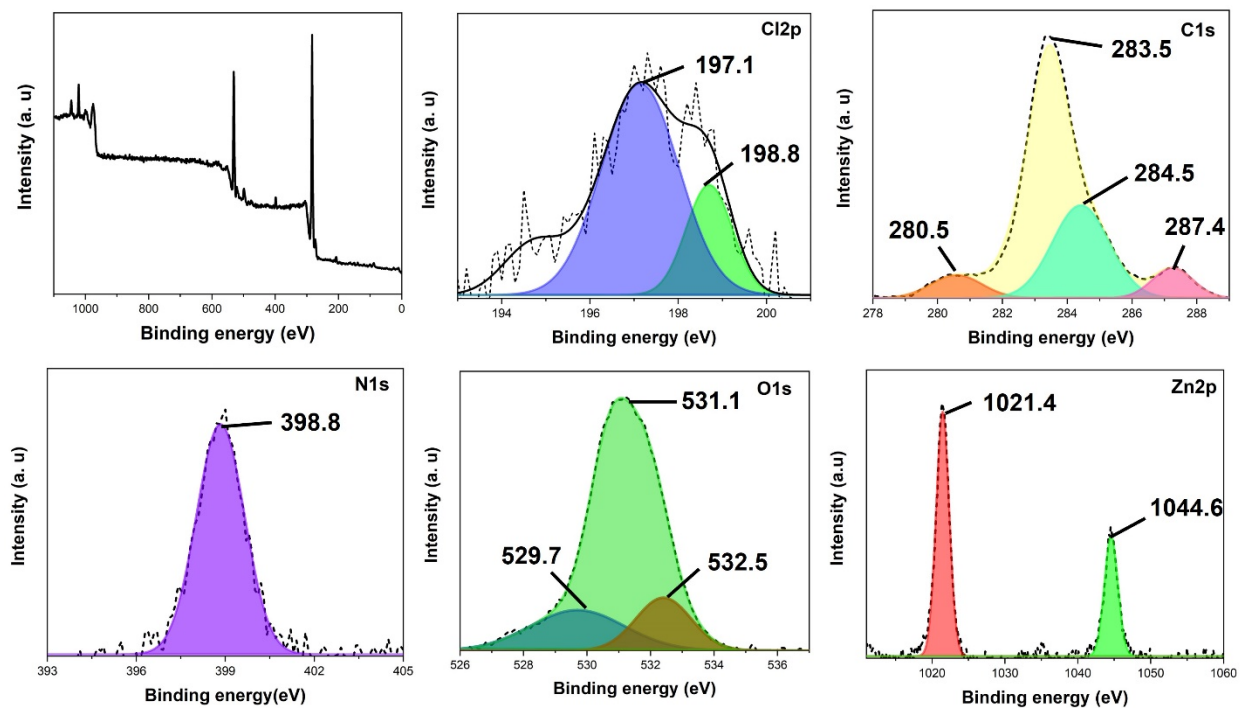

Figure S16 XPS spectral peaks for compound 3.

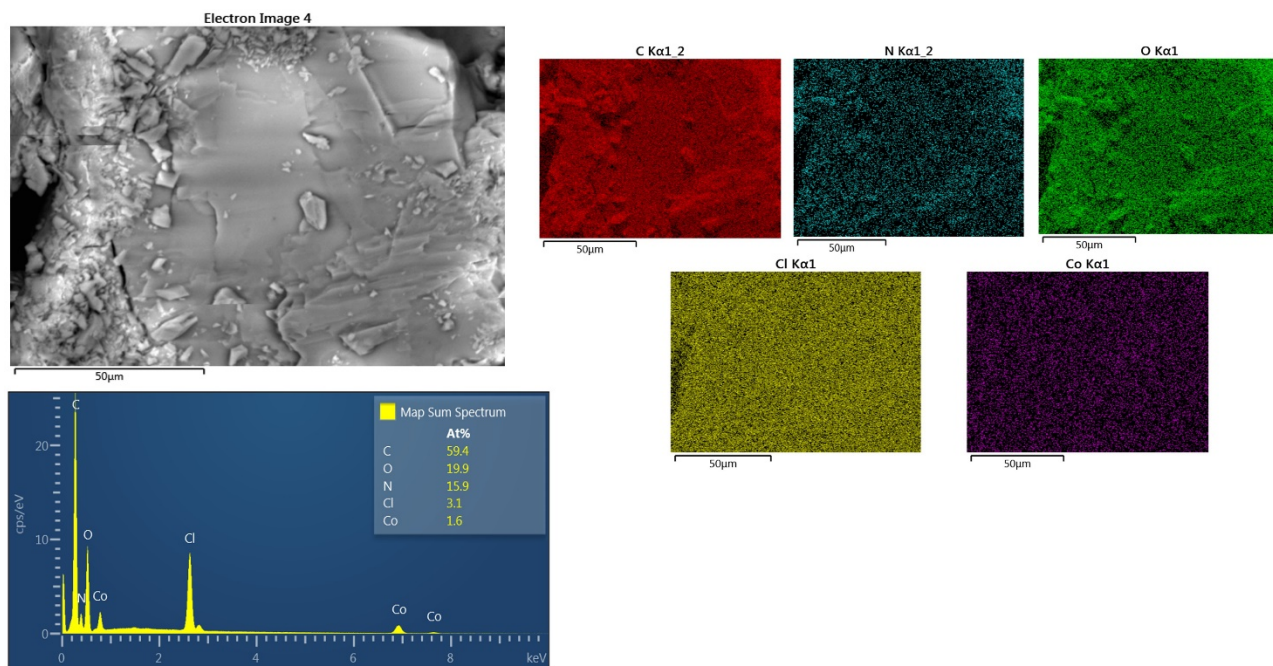

Figure S17 EDS spectra of compound 2

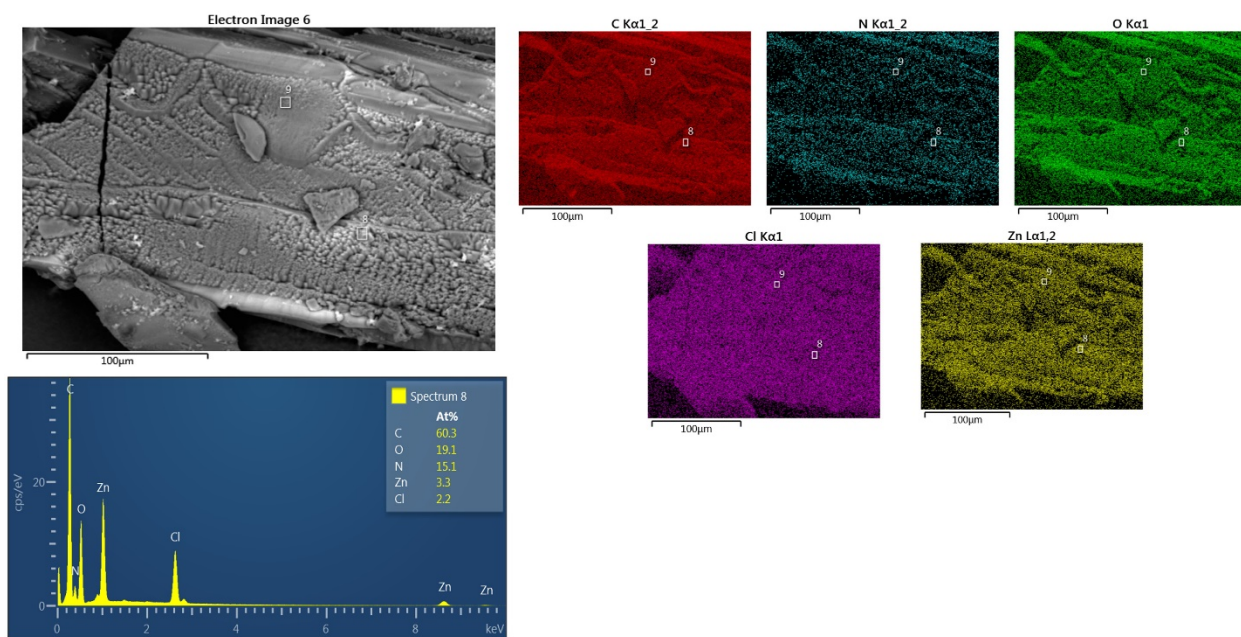

Figure S18 EDS spectra of compound 3

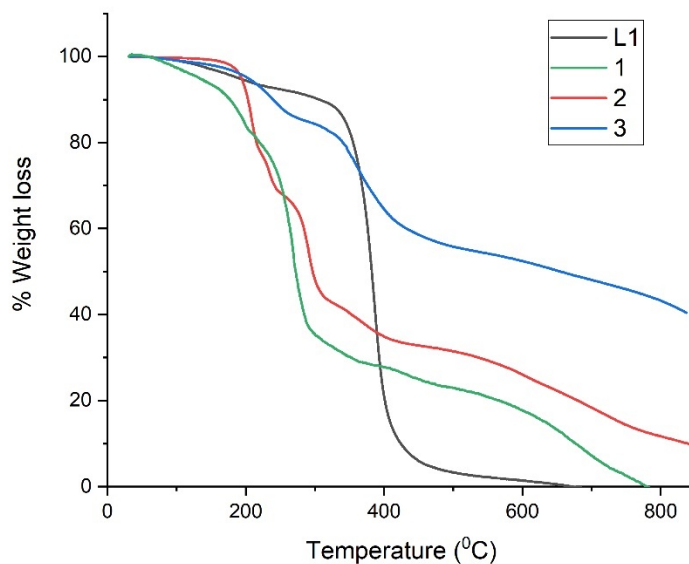

**Figure S19** Thermogravimetry curves for **L1** and **1-3**.

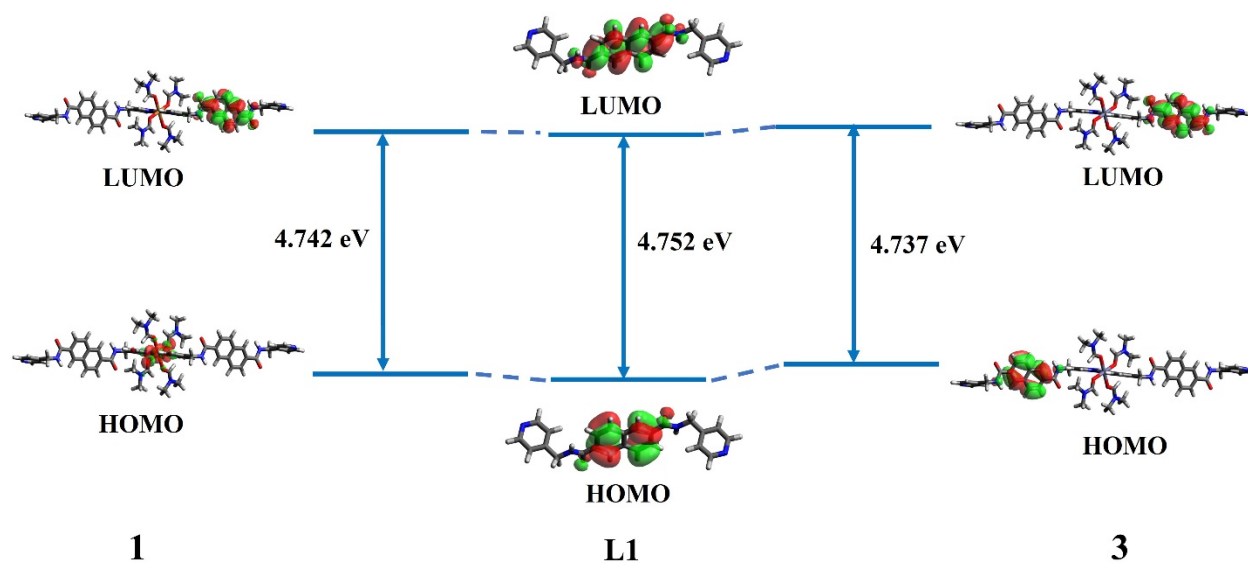

**Figure S20** Variation of HOMO-LUMO energy gap in compounds **1** and **3** relative to **L1**. (Note- This figure is showing speculative anomaly in HOMO-LUMO energies of compounds **1** and **3** due to solvent effect of DMF. In both cases, HOMO orbitals are more affected by solvent interactions than LUMO orbitals.)

Table S2. Hydrogen bonds for **L1** [ $\text{\AA}$  and deg.].

| D-H...A              | d(D-H) | d(H...A) | d(D...A) | <(DHA) |
|----------------------|--------|----------|----------|--------|
| N(1)-H(1)...O(2)#1   | 0.88   | 2.02     | 2.801(4) | 147.1  |
| N(3)-H(3)...O(1)#2   | 0.88   | 2.05     | 2.821(4) | 146.5  |
| C(3)-H(3A)...O(2)#3  | 0.95   | 2.73     | 3.382(5) | 126.6  |
| C(6)-H(6)...N(2)#4   | 0.95   | 2.71     | 3.556(5) | 149.3  |
| C(4)-H(4)...N(2)#4   | 0.95   | 2.83     | 3.657(6) | 145.8  |
| C(1)-H(1A)...N(4)#5  | 0.95   | 2.68     | 3.538(5) | 150.7  |
| C(9)-H(9)...N(4)#5   | 0.95   | 2.86     | 3.681(6) | 145.4  |
| C(16)-H(16)...O(1)#6 | 0.95   | 2.84     | 3.640(6) | 142.0  |

Symmetry transformations used to generate equivalent atoms:

#1  $-x+1, -y+2, -z+1$  #2  $-x+1, -y+1, -z+1$  #3  $x+1, y, z$  #4  $x-1, y-1, z-1$  #5  $x+1, y+1, z+1$  #6  $-x+2, -y+2, -z+2$

Table S3. Hydrogen bonds for **1** [ $\text{\AA}$  and deg.].

| D-H...A                          | d(D-H) | d(H...A) | d(D...A) | <(DHA) |
|----------------------------------|--------|----------|----------|--------|
| C(3)-H(3)...O(4 <sup>a</sup> )#1 | 0.950  | 2.574    | 3.197    | 123.3  |
| C(3)-H(3)...O(2 <sup>a</sup> )#2 | 0.950  | 2.879    | 3.649    | 137.16 |
| C(7)-H(7b)...O(5)#3              | 0.990  | 2.989    | 3.590    | 120.21 |
| C(9)-H(9)...O(4 <sup>a</sup> )#4 | 0.950  | 2.862    | 3.687    | 145.88 |
| N(2)-H(2)...O(1 <sup>a</sup> )#4 | 0.880  | 2.081    | 2.930    | 160.64 |

|                                                                  |       |       |       |        |
|------------------------------------------------------------------|-------|-------|-------|--------|
| C(16 <sup>b</sup> )-H(17 <sup>a</sup> )...O(2 <sup>a</sup> )#5   | 0.880 | 2.177 | 2.904 | 139.64 |
| C(17 <sup>b</sup> )-H(17e <sup>a</sup> )...O(3a <sup>b</sup> )#6 | 0.879 | 2.675 | 3.510 | 159.21 |
| C(17a <sup>a</sup> )-H(17e <sup>a</sup> )...O(1 <sup>a</sup> )#6 | 0.980 | 2.977 | 3.899 | 156.4  |
| C(11)...O(11)#6                                                  | 0.950 | 2.439 | 3.292 | 149.34 |
| C(18b <sup>b</sup> )-H(18a <sup>b</sup> )...O5 #7                | 0.980 | 2.418 | 3.314 | 151.68 |
| C(18a <sup>b</sup> )-H(18e <sup>a</sup> )...O5 #7                | 0.882 | 2.519 | 3.314 | 150.25 |
| C(14a <sup>a</sup> )-H(14c <sup>b</sup> )...O4a <sup>b</sup> #7  | 1.080 | 2.589 | 3.686 | 140    |
| C(18a <sup>a</sup> )-H(18e)...O#7                                | 0.980 | 2.519 | 3.182 | 160.5  |
| C(15a <sup>a</sup> )-H(14b <sup>b</sup> )...N3 <sup>b</sup> #8   | 1.416 | 2.660 | 3.753 | 131.59 |
| C(15a <sup>a</sup> )-H(15f <sup>a</sup> )...N3a <sup>a</sup> #8  | 0.980 | 2.770 | 3.744 | 172.91 |
| C(14 <sup>b</sup> )-H(14b <sup>b</sup> )...N3 <sup>b</sup> #8    | 0.980 | 2.660 | 3.631 | 170.66 |
| C(15 <sup>b</sup> )-H(15c <sup>b</sup> )...N(3a <sup>a</sup> )#9 | 0.980 | 2.874 | 3.795 | 156.84 |
| C(14a <sup>a</sup> )-H(14e <sup>b</sup> )...O(3 <sup>b</sup> )#9 | 0.98  | 2.597 | 3.537 | 160.9  |

---

Symmetry transformations used to generate equivalent atoms:

#1 -x+2,-y,-z #2 -x+1,+y,+z #3 -x+2,-y+1,-z #4 -x+1,-y,-z #5 -x+1,-y+1,-z+1 #6 x,y+1,z  
 #7 x-1,+y,+z #8 -x,y+1,-z+1 #9 -x+1,-y,-z+1

Table S4. Hydrogen bonds for **2** [Å and deg.].

---

| D-H...A               | d(D-H) | d(H...A) | d(D...A) | <(DHA) |
|-----------------------|--------|----------|----------|--------|
| C(17)-H(17C)...O(1)#3 | 0.96   | 2.49     | 3.412(3) | 160.0  |
| C(16)-H(16)...O(1)#3  | 0.93   | 2.52     | 3.383(3) | 154.6  |

|                       |      |      |          |       |
|-----------------------|------|------|----------|-------|
| C(4)-H(4)...O(6)#4    | 0.93 | 2.88 | 3.508(3) | 126.2 |
| C(5)-H(5)...O(6)#4    | 0.93 | 2.90 | 3.536(3) | 126.4 |
| C(1)-H(1)...O(5)#5    | 0.93 | 2.88 | 3.527(3) | 127.5 |
| C(1)-H(1)...O(7)#5    | 0.93 | 2.56 | 3.401(3) | 149.9 |
| C(2)-H(2A)...O(4)#5   | 0.93 | 2.83 | 3.601(4) | 141.2 |
| C(12)-H(12)...O(6)#2  | 0.93 | 2.93 | 3.740(4) | 147.1 |
| C(14)-H(14C)...N(4)#6 | 0.96 | 2.91 | 3.767(3) | 149.3 |
| C(18)-H(18B)...O(7)#7 | 0.96 | 2.58 | 3.283(3) | 130.0 |
| C(14)-H(14A)...O(1)#8 | 0.96 | 2.57 | 3.383(3) | 142.4 |
| C(14)-H(14B)...O(6)#9 | 0.96 | 2.75 | 3.677(4) | 162.4 |
| C(15)-H(15A)...O(7)#9 | 0.96 | 2.64 | 3.290(4) | 125.7 |
| C(15)-H(15B)...O(4)#9 | 0.96 | 2.84 | 3.628(5) | 139.6 |

---

Symmetry transformations used to generate equivalent atoms:

#1 -x+1,-y+1,-z+2 #2 -x+2,-y,-z+1 #3 x-1,y,z #4 -x+1,-y,-z+1 #5 -x+1,-y+1,-z+1 #6  
x+1,y,z #7 x,y+1,z+1 #8 -x+2,-y+1,-z+2 #9 x+1,y+1,z+1

Table S5. Hydrogen bonds for **3** [A and deg.].

---

| D-H...A               | d(D-H) | d(H...A) | d(D...A) | <(DHA) |
|-----------------------|--------|----------|----------|--------|
| C(17)-H(17)...O(1)#3  | 0.93   | 2.53     | 3.391(3) | 154.4  |
| C(18)-H(18A)...O(1)#3 | 0.96   | 2.50     | 3.411(3) | 158.8  |
| C(4)-H(4)...O(6)#4    | 0.93   | 2.88     | 3.505(3) | 125.9  |



|                       |      |      |          |       |
|-----------------------|------|------|----------|-------|
| C(5)-H(5)...O(6)#4    | 0.93 | 2.91 | 3.535(3) | 126.2 |
| C(1)-H(1)...O(4)#5    | 0.93 | 2.90 | 3.538(3) | 127.0 |
| C(1)-H(1)...O(5)#5    | 0.93 | 2.56 | 3.390(3) | 149.1 |
| C(2)-H(2A)...O(7)#5   | 0.93 | 2.83 | 3.600(4) | 140.8 |
| C(12)-H(12)...O(6)#2  | 0.93 | 2.94 | 3.755(3) | 147.3 |
| C(14)-H(14A)...N(4)#6 | 0.96 | 2.89 | 3.769(3) | 151.9 |
| C(16)-H(16B)...O(5)#7 | 0.96 | 2.58 | 3.297(3) | 131.1 |
| C(14)-H(14B)...O(6)#8 | 0.96 | 2.77 | 3.677(4) | 158.8 |
| C(15)-H(15B)...O(7)#8 | 0.96 | 2.87 | 3.662(4) | 140.1 |
| C(15)-H(15C)...O(5)#8 | 0.96 | 2.64 | 3.283(3) | 125.0 |
| C(14)-H(14C)...O(1)#9 | 0.96 | 2.59 | 3.382(3) | 139.6 |

---

Symmetry transformations used to generate equivalent atoms:

#1 -x+1,-y+1,-z #2 -x,-y+2,-z+1 #3 x+1,y,z #4 -x+1,-y+2,-z+1 #5 -x+1,-y+1,-z+1 #6 x-  
1,y,z #7 x,y-1,z-1 #8 x-1,y-1,z-1 #9 -x,-y+1,-z
